# Supplementary material for: SmRAV1, an AP2 and B3 Transcription Factor, Positively Regulates Eggplant’s Response to Salt Stress
Source: MDPI journal article supplement (doi:10.3390/plants12244174), 2023-12-15
Supplement: s1 [file s1]

**Table S2.** Secondary structure of the SmRAV1 protein.

|        | Alpha helix<br>(Hh) | Beta turn<br>(Tt) | Extended strand (Ee) | Random coil (Cc) |
|--------|---------------------|-------------------|----------------------|------------------|
| SmRAV1 | 87 (23.77%)         | 18 (4.92%)        | 78 (21.31%)          | 183 (50.00%)     |
