# Supplementary material for: SmRAV1, an AP2 and B3 Transcription Factor, Positively Regulates Eggplant’s Response to Salt Stress
Source: MDPI journal article supplement (doi:10.3390/plants12244174), 2023-12-15
Supplement: s1 [file s1]

**Table S1.** Sequences of primer pairs were used in this study.

| Primer name     | Forward (5' to 3')         | Reserves (5' to 3')       |              |
|-----------------|----------------------------|---------------------------|--------------|
| <i>SmRAV1</i>   | CAGATCAGCTCAGCCAGTGA       | ATGATGCTGACTCCACTTCC      | RT-qPCR      |
| <i>SmActin</i>  | CACTTAGCACCTTCCAGCAGATGT   | GTACAACAGCAGACCTGAGTTCACT | RT-qPCR      |
| <i>SmGSTU10</i> | GGGTGACCACTCTGCTTGAG       | TGAAACGTAAAGCCATTTTGC     | RT-qPCR      |
| <i>SmNCED1</i>  | GCCATCAACAAAAGAGTTTGG      | TGGAGAATAGGAGGAGCTTGA     | RT-qPCR      |
| <i>SmRAV1-</i>  | CTGTACAAGGGTACCCCCGGGATG   | AGAGGATCCGTCGACCCCGGGTCAC | Subcellular  |
| pBinGFP2        | GACATAAGTTTCATAGATCAAGATCA | AAGGCATCAATTATAACCTT      | localization |
| <i>SmRAV1-</i>  | GGGGACAAGTTTGTACAAAAAAGCA  | GGGGACCACTTTGTACAAGAAAGCT | VIGS         |
| VIGS            | GGCTTCCAAACGATGTACTGGAGCTG | GGGTCAGTACAAAAAGGAAAAGAAA |              |
